# Supplementary material for: Gonadal Transcriptome Analysis and Sequence Characterization of Sex-Related Genes in Cranoglanis bouderius
Source: MDPI journal article supplement (doi:10.3390/ijms232415840), 2022-12-13
Supplement: s1 [file s1]

Supplemental Table S1. Sequences of primers.

| Primers               | Sequences (5' → 3' )        |
|-----------------------|-----------------------------|
| β-actin-F             | ATGAAGATCCTGACCGAGAGAGGCTAC |
| β-actin-R             | GCCAATGGTGATGACCTGTCCG      |
| evm.TU. Contig12.4-F  | AGCGAGTACAGCATCCTTTC        |
| evm.TU. Contig12.4-R  | GCTTCTGGAGTGTCTCCCAT        |
| evm.TU. Contig154.2-F | ACTGACCTTGAGATGCGTAG        |
| evm.TU. Contig154.2-R | CTCATTCTCCTTATTGTGCC        |
| evm.TU. LG21.491-F    | TCCAAAAGAGGAAGAAATAC        |
| evm.TU. LG21.491-R    | GTTGTCTAAACAGCATCAC         |
| evm.TU. Contig213.2-F | CTTGGGCAGTAGAAAGAGCA        |
| evm.TU. Contig213.2-R | GCATGGTTGTTACCGTTGAT        |
| evm.TU. LG30.278-F    | ACAACCCGAACCTCAAACG         |
| evm.TU. LG30.278-R    | CGGATAATGGAAATGCCTC         |
| evm.TU. LG22.331-F    | CCTGGAATCACAGTACAAGC        |
| evm.TU. LG22.331-R    | CAACGTAGCAGCATAGTTTT        |
| evm.TU. LG18.427-F    | GAGACACCACGAGGTTTGCC        |
| evm.TU. LG18.427-R    | GAAGAGCCCTGCCACGACA         |
| evm.TU. Contig293.2-F | GGCTGGATGTGAGCACGAT         |
| evm.TU. Contig293.2-R | CGCTGCGGAGGGAAGAAA          |
| evm.TU. Contig293.6-F | TGGGCTTGTCTGGTCTATGCTG      |
| evm.TU. Contig293.6-R | CGTTGGTGGCTTCAGTGAGGAT      |
| evm.TU. Contig303.3-F | TGACCAGATGGGTAAACAAGGGAG    |
| evm.TU. Contig303.3-R | GGCTTAACATTCGGATGAGGCAC     |
| evm.TU. LG08.21-F     | GCAGACCGCACCTGAGAAGACT      |
| evm.TU. LG08.21-R     | GAGGGAAGCATGACATCATTGTAGAG  |
| evm.TU. Contig331.1-F | CCCCAACTCCATCACCGAATC       |
| evm.TU. Contig331.1-R | CGCACGACGAGGAAGAGGA         |
| evm.TU. Contig332.5-F | TTACGGAGATAAATGCTGGAATGAAC  |

|                       |                           |
|-----------------------|---------------------------|
| evm.TU. Contig332.5-R | GGAGAACGATGAGGGCTGGAC     |
| evm.TU. Contig332.6-F | TCATTGAAGAAGAAACGAGGCAGTA |
| evm.TU. Contig332.6-R | CAGGCAGCGTGGGTAAATCC      |
| evm.TU. Contig345.4-F | CGCTCTTGCTCGGCATTCT       |
| evm.TU. Contig345.4-R | TGGCACTCGGTACGGGTCTG      |

---

F: (sense primer); R: (antisense primer).
