# Supplementary material for: Gonadal Transcriptome Analysis and Sequence Characterization of Sex-Related Genes in Cranoglanis bouderius
Source: MDPI journal article supplement (doi:10.3390/ijms232415840), 2022-12-13
Supplement: s1 [file s1]

*amh*

Gene ID: evm.TU.LG21.491strand: +start: 17832766end: 17836251length: 3486

Transcript ID: evm.model.LG21.491 start: 17833436 end: 17835413 length: 840

CDS (evm.model. LG21.491) Length:840 type:complete

ATGGCTGGAGTAAGGACGAAGTTCTTAAATGAAGTCTCCCCTCAGGGAAAT  
CCACTACTTGCACAAGATGAGGTCAGGACAGTCAGCTCGAGTGTTCTTCAC  
TCTCTGCCCCCTTTAACTCTTGGAGTGTCTTCAAGCGAGTCTCTTCTTCTTG  
AGCTGGTCAATTCCTCAGGCCCAACTGTGTTCTACTTCCCCCGCCAAAGCT  
TGGGACTGAGGACCCACCGAGTGGAGCTGGCCCTAAAGCCATCACTGCGC  
TCTGTGTTGAAATTAAACTAGATGAGGCTTTAGCCCAAGTGCAGATGGAG  
GAAGTTGGACGTGGTGCGCTAGATAAGCTGCAGATTCTCAGTGTTCTCAGT  
ACACTTCCTGAAGATGGAGAGGAGCTGGAAACAGGTGATCAGTTTACTGT  
TGTTGCTGTCTGTTTGGGGAACCAACGTGAGGTCCAATACAGAGCCCTCTT  
ACTGCTGAAGGCCTTACAGGCTGTGCTAGGTGCTTGGGCAGTAGAAAGAG  
CACAGAGGGCAGCCCGAGCTGGTCAGGAAGGACCCACAAGGCTTAGTCA  
GTGTCATCTTGAGAGTTTCACTGTGTCTCTGGAGAAGTACCTGTTGGAACC  
TGCCACGGCCAACATTAACAACACTGTGAAGGAGCATGTGGATTCCCCCTGAT  
CAACGGTAACAACCATGCCATCCTATTGAACAGTCACTTCCAGAGTGGACA  
ACCTCTAAATCGTACACTCTGCTGTGTGCCCGTGGCATATGATGACCTATGT  
GTGATTGAGCTGTACAGTGATTCCACCACCATTCTTACAAGACCAACATG  
GTAGCCAAGGAGTGTGGATGTCGCTGA

protein(evmodel.LG21.491) Length: 279

MAGVRTKFLNEVSPQGNPLLAQDEVRTVSSSVLHSLPPLTLGVSSSESLLLLLV  
NSSGPTVFYFPRQSLGLRTHRVELALKPSLRSVLKLKLDEALAQVQMEEVGR  
GALDKLQILSVLSTLPEDGEETGDQFTVVAVCLGNQREVQYRALLLLKALQ  
AVLGAWAVERAQRAARAGQEGPTRLSQCHLESFTVSLEKYLLEPATANINNCE  
GACGFPLINGNNHAILLNSHFQSGQPLNRTLCCVPVAYDDLCVIELYSDSTTIS  
YKTNMVAKECGCR

*dax1*

Gene ID: evm.TU.LG22.331strand: -start: 16556084end: 16557261length: 1178

Transcript ID: evm.model.LG22.331 start: 16556084 end: 16557261 length: 873

CDS (evm.model. LG22.331) Length:873 type:complete

ATGCATGGAAGTGAGCAGAAGAAGAGACATCTGTTCCAGTCAGGACGCTC  
GGCGAGCATGGCTCATTCTGGAGAGTTGTGAGTGCGGGCGGCGAGCGGGCGCC  
ACCCGAGCATTCTCTACAGCCTGCTGAAGAAGGAGAGCGCGCCGGGCGCG  
TCCGCGCGAGCGCCTCGCAGCGCCAGGTTCGCCGTGGCGGGCGCGCACGTG  
CGCGTGCGGTGTCGCGCGGGCCGGTAGCGCTGCGCTCTCCGCACGCAACGT  
GCGCCGCGGCCTCGGCTGTGCTCGCCAAGACGCTGCGCTTCGTCAAGAGC  
GTGCCGTGTTTCGGTGAGCTGCCCCCCTGCGACCAGCGCGCTCTGGTGCG  
AAGTGGCTGGGCGCCGTTGCTTGTGCTCGGAATGGCGCAGGACGGACTGG  
ACTTCGAGACGCGCGAGAGCGCCGAGCCCAGCATGCTGCAGCGCCTCCTC  
ACCGGCGCGCACGAGCGGCCCCGCGAGCCCGCACGACCACGGCGCTCACG  
TCATTAACGGCGGGCGGAGGGGTGGCGCTGGCCGAGGCGCAGGGCATTAAA  
GCGTTCCTCAGCAAATGCTGGGACCTCGACATCAGCACCAAGGAATACGCC  
TACTTAAAGGGAGCCATTCTGTTTAACCCAGACATTGCCGGACTGCAGTGT  
CAGCACTACATCCAGGCTCTGCAGAGCGAGGCGCACCAAGGCTCTTAATGA  
ACATGTCAAACCTGATTCACCGAGGAGACACCACGAGGTTTGCCAAACTCT  
TCATTGCCCTCTCAATGCTACGATCCATCAACGCCAATGTCGTGGCAGGGCT  
CTTCTTCAGACCTGTCATTGGCACAGTAAACATGGAAGAACTTCTCCTCGA  
GATGTTTTACGGAAAGTAG

Protein (evm.model.LG22.331) Length: 290

MHGSEQKKRHLFQSGRSASMAHSECECGGERRHPSILYSLLKKESAPGASAR  
APRSARFAVAARTCACGVARPVALRSPHATCAAASAVLAKTLRFVKSVPFCGE  
LPACDQRALVRSGWAPLLVLGMAQDGLDFETRESAEP SMLQRLLTGAHERPA  
SPHDHGAHVINGGGGVALAEAQGIKAFLSKCWDLDISTKEYAYLKGAILFNP  
IAGLQCQHYIQALQSEAHQALNEHVKLIHRGDTTRFAKLFIALSMLRSINANV  
VAGLFFRPVIGTVNMEELLLEMFY GK

*nanos1*

Gene ID: evm.TU.LG18.427strand: -start: 13963549end: 13978279length: 14731

Transcript ID: evm.model.LG18.427 start: 13963549 end: 13978279 length: 936

CDS(evm.model.LG18.427)Length:936 type:complete

ATGGACCCAGCAGACAAGGGGGAAAGGCTTATAACCAGCAGCCTCGCGCG  
CAGCCCGAAATACCCAAGACAAGCGCTGGACCTGACTACATCTGTTAGCTA  
CTTGCCGTTTCAATTGGGACGGAATATTTATTATCCGTTTTATCCTGCACAGA  
GAGGCGCCGTCGCGCCGCTCGGGAGTCAGGGGAAAAGCGAGATGGATTTT  
TTAAACCACAGCTACTTAAGCGCGCGCACGTCCTACGACTACACGTTCAAC  
TTCTGGAACGACTATCTGGGCCTGTCCACGCTGGTGACGCAGAGCAGCAA  
GCGCGGTCCCCGGCGGGAGCGAGCCCCAACTCCATCACCGAATCTCTGA  
AAGCCACACTGGGCCTGGATGACCCTGTGCCGTGCCCATGCGCCGCGCAC  
TTGGACTACTGCTGCTGCTCATCCTCGTGCTGCTCCTCTTCCTCGTCGTGCG  
GCTGCTGCTGCCCTCCCGCAAGCCCGCCGCGCCTTCCCTAGTTGAGCTCA  
AGGAGCGCTTCTCGGCGCTCGGGCCGTTCCGTAGCCACGGCGCAGGGATT  
GTAGGGCATGAGCGCGACGCGGGCTTCGGAGGAGGAGGAGGAGGAGGAG  
GAGGTGGAAGTTTCGCGGCTTTCGAGCTGTTTCGGCGCGGATAGGAAGGTG  
CGCAAGACAGCTGCGGCGCGCGCCAAGCAGGAGCCCAAGATCTGCGTGTT  
CTGTCTGGAATAACGGCGCGCCTGAAGAGGTGTACGGCTCGCACGTGCTGA  
AGGCGCCCGACGGCCGCGTGGTGTGCCCCGATCCTGCGCGCATAACAGTGC  
CCGCTGTGCAGCGCCAACGGCGACAACGCACATACCATCAAGTACTGTCC  
ACTCTCCAAGGAGCAGCCCGCGCCTCGAGCGCTCAAAGGAGGCCGGGCTG  
TGGGCGGTAAGCGCGTCAAAATCTTCTAA

Protein (evm.model.LG18.427) Length: 311

MDPADKGERLITSSLARSPKYPRQALDLTTSVSYLPFQLGRNIYYPFYPAQRGA  
VAPLGSQGKSEMDFLNHSYLSARTSYDYTFNFWNDYLGLSTLVTQSSKRGP  
GGASPNSITESLKATLGLDDPVPCPAHLDYCCCSSSCSSSSSCGCCCPPASP  
PPPSLVELKERFSALGPFRSHGAGIVGHERDAGFGGGGGGGGGGSFAAFELFG  
ADRKVRKTAAARAKQEPKICVFCRNNGAPEEVYGSHVLKAPDGRVVCPI  
LRA YTCPLCSANGDNAHTIKYCPLSKEQPAPRALKGGRAVGGKRVKIF

*ar*

Gene ID: evm.TU.LG08.21strand: .start: 4453979end: 4539864length: 85886

Transcript ID: evm.model.LG08.21 start: 4453979 end: 4539864 length: 2571

CDS (evm.model. LG08.21) Length:2571 type:complete

ATGGAAGCTCGGTTTCGGTTTAGGCGGAGTTTTTGATTCTCCGTTCCGAACG  
GTGCGTCCGCATGGCGCGCGAGACATCGGAGCGGCGGGAGAAGTTGTTCC  
GCTGGCGGAGATGTGGGACGGAGAGTGGAGAGACGCGCGCGGGATTAGC  
AGCACCGGCGGCGGCGGAGGAGGAGGAAGTGGGGGAGGAGGAGGAGGA  
GGAGGAGGGACAGCGCGCTCCGTTACAGCGGCGCTCGCGCGGGACGGAA  
GAGAAACCTCGAGTTGCACGGAGGCCCGCGCCGCCACCACCACGCTGAG  
GGAGCTGCTCTGTCCGGACACCGGATACAACAACAACACAGCAGCA  
GAAGCAGCAGCGACAACCACAACACCGCTCCGAGAGCACGCGGCAGCGC  
GCGCGAGCTGACAGCCGGCGGTGGTGGTGACACGAGCGCCGACCCGAGC  
TGCTGCTGTTCCGGAAGCACCGGCACGACCACCAGCACCCACGACCATCTC  
TGAGACGGCGCGCGAGCTGTGCAAAGCCGTGTCCGTGTCGCTGGGGCTGG  
CCATGGACCCGCACGCGCACCCAGGACGGGAACAGGAGCTCGGACTTTTTTC  
GAAGTGCGCCGGAGGAAGGAGGAGGAAGAGGAGCGGGTGACGCGCCA  
AGCGACGACAGGAACAGAAGGATCAGCAGCAGCAGCGCGAGCGCAGGTG  
GAGGTTGCGCCTCAGGGGAACGTGAGGGACGCGCGCCGCACGTGCACGG  
CGACAACAACAACTGCTCGAGATGTTCAAAGTGGGGGCGAGGAGAAC  
CTGATGATGATGACGACGATACAGATGGACAACGTTTCGCGCGCATCACCAT  
ACGTCAGTGATAACGGAAAATTCGGAGTTCGGACCGGGCGTCGCGAGCCT  
GATGAGTTCCAAAAGCGCGAGCGCGGGCGGGTTCGTCGTCTTCCTCTTC  
GTCCTGTCAGTTCCAACAACAACAACACTACACGACCCGCAGGTAAACT  
TCGAGCACGCGCCGCCCCTGCACGACAGGTACGGTGATGATTACTACTACT  
ACTGGCCGCGCTACAGCAACGTGCGCGTGAAGTCCGAGGCCGTGCCGCCA  
TCGGTGACTCGCTACTGTCACGACGCTGCGCAGTACGGGAATCCCACGTGC  
ACCGCCTCCTCCGCCGGACTGGACGCGCCGCTCATCTGCAGCCCGTACGAG  
TACGACTACGGCGCGCGGACCGGACCGGGACCGGCTCTCAGCGCCGCGCA  
CGAGTCATGGTACCACCAGAGCGGCGCCGTGTTACCCCGCGTGTCTACCC

AACCGCCACGTGCATGAAGAACGAAGTCGGGGAATGGCTGGATGTGAGCA  
CGATGCAGGACGGCAGGTTGGAGAGTGCGAGGGAGGTGTTCCCATGGAG  
TTTTTCTTCCCTCCGCAGCGCACCTGCCTGATCTGCTCTGATGAAGCTTCCG  
GTTGCCATTACGGAGCTCTGACCTGCGGCAGCTGCAAAGTGTTTTTCAAAA  
GAGCGGCTGAAGGGAAGCAGAAGTATCTGTGTGCGAGCAGGAACGACTG  
CACCATCGATAAGCTGAGGAGGAAGAACTGTCCGTCATGCCGTCTGAAGA  
AGTGCTTTGAGGCAGGAATGACTCTCGGAGCTCGTAAACTGAAGAAGATT  
GGTCACCTGAAGGTTCCCTGAAGAGGAGGGCCCGGTTTCATCTATGCCGTCC  
GGTTCCGGTTCGGTCGAGATGATCCGGAATCCATCACCCAAAGCGAGTCTG  
ACGCTCCACTCACAGCTCGTCTTCCTCAGCATCCTGGAGTCCATCGAGCCT  
GAAGTGGTGAACGCCGGTCATGACCACGCACAGCCCGACTCCGCTGCTGC  
CCTCCTGACCAGCCTTAACGAGCTTGGAGAGAGGCAACTCGTTAAGGTGG  
TGAAATGGGCCAAAGGACTGCCAGGATTCCGTAACCTCCACGTGGACGAT  
CAGATGACGATGATCCAACATGCCTGGATGGCTGTGATGGTCTTCGCTCTC  
GGATGGAGATCGTACAAAAACGTCAACGCTCGCATGCTCTACTTCGCTCCT  
GACCTGGTCTTCAATGATCGGAGGATGCACATCTCCAGTATGTATGAACACT  
GTCTGCAGATGAAACACTTGTCGCAGGAGTTCGTTTTGCTGCAGGTCACAC  
AGGAGGAGTTTCTCTGCATGAAGGCCCTCCTCCTCTTCAGCATCATTCCTGT  
GGAGGGATTGAAGAGTCAGAAGTACTTTGATGAGTTGAGGTTGTCGTATAT  
AAACGAACTCAATCGTCTGATTAATTACGGCAGGAAGAGTAACTGTGCACA  
GCGTTTCTACCAACTGACCAGACTGATGGACTCACTGCAGCCGATTGTCCG  
GAAGCTTCACCAGTTCACCTTTGACCTTTTCGTTTCAGGCTCAGTCTCTGCC  
CACGAAGGTCAGCTTCCCGGAGATGATCGCCGAAATCATCTCAGTGCAGGT  
ACCAAAGATCCTCGCCGGCCTGGCCAAGCCCATCCTGTTCCACAAGACTGT  
GACTCCGCCCTCTCCCGCACCCATTCTGGTCACACCCACTCAGCCAGACCT  
GGCCTGA

Protein (evm.model.LG08.21) Length: 856

MEARFGLGGVFDSPFRTVRPHGARDIGAAGEVVPLAEMWDGEWRDARGISS  
TGGGGGGGSGGGGGGGGGTARSVTAALARDGRETSSCTEARAATTTLRELLC  
PDTGYNNNNHSSRSSSDNHNTAPRARGSARELTAGGGGDTSADPSCCCSGST

GTTTSTTTISETARELCKAVSVSLGLAMDPHAHQDGNRSSDFFEVRRRKEEEE  
ERVHAPSDDRNRRISSSSASAGGGCASGEREGRAPHVHGDNNKLLEMFKSGG  
EENLMMMTTIQMDNVRAHHHTSVITENSEFGPGVASLMSSKSASAAAGSSSS  
SSSCQFQQQQQLHDPQVNFEHAPPVHVDYGGDYWWWPRYSNVRVKSEAVP  
PSVTRYCHDAAQYGNPTCTASSAGLDAPLICSPYEYDYGARTGPGPALSAHE  
SWYHQSGAVLPRVSYPTATCMKNEVGEWLDVSTMQDGRLESAREVFPMEFF  
FPPQRTCLICSDEASGCHYGALTCGSCKVFFKRAAEGKQKYL CASRNDCTIDK  
LRRKNCPSCRLKKCFEAGMTLGARKLKKIGHLKVPEEEGPVSSMPSGSGSVE  
MIRNPSPKASLTLHSQLVFLSILESIEPEVVNAGHDHAQPDSAAALLTSLNELG  
ERQLVKVVKWAKGLPGFRNLHVDDQMTMIQHAWMAVMVFALGWRSYKNV  
NARMLYFAPDLVFNDRRMHISMYEHCLQMKHLSQEFVLLQVTQEEFLCMK  
ALLFSIIPVEGLKSQKYFDELRLSYINELNRLINYGRKSNCAQRFYQLTRLMD  
SLQPIVRKLHQFTFDLFVQAQSLPTKVSFPEMIAEII SVQVPKILAGLAKPILFH  
KTVTPPSPAPILVTPTQPDLA
