# Supplementary material for: Gonadal Transcriptome Analysis and Sequence Characterization of Sex-Related Genes in Cranoglanis bouderius
Source: MDPI journal article supplement (doi:10.3390/ijms232415840), 2022-12-13
Supplement: s1 [file s1]

Supplemental Table S3. Sequences of primers.

| Primers          | Sequences (5' → 3' )        |
|------------------|-----------------------------|
| $\beta$ -actin-F | ATGAAGATCCTGACCGAGAGAGGCTAC |
| $\beta$ -actin-R | GCCAATGGTGATGACCTGTCCG      |
| <i>amh</i> -F    | CTTGGGCAGTAGAAAGAGCA        |
| <i>amh</i> -R    | GCATGGTTGTTACCGTTGAT        |
| <i>dax1</i> -F   | GAGACACCACGAGGTTTGCC        |
| <i>dax1</i> -R   | GAAGAGCCCTGCCACGACA         |
| <i>nanos1</i> -F | CCCCAACTCCATCACCGAATC       |
| <i>nanos1</i> -R | CGCACGACGAGGAAGAGGA         |
| <i>ar</i> -F     | GGCTGGATGTGAGCACGAT         |
| <i>ar</i> -R     | CGCTGCGGAGGGAAGAAA          |

F: (sense primer); R: (antisense primer).
