# Supplementary figures and images for: Gonadal Transcriptome Analysis and Sequence Characterization of Sex-Related Genes in Cranoglanis bouderius
Source: MDPI journal article supplement (doi:10.3390/ijms232415840), 2022-12-13

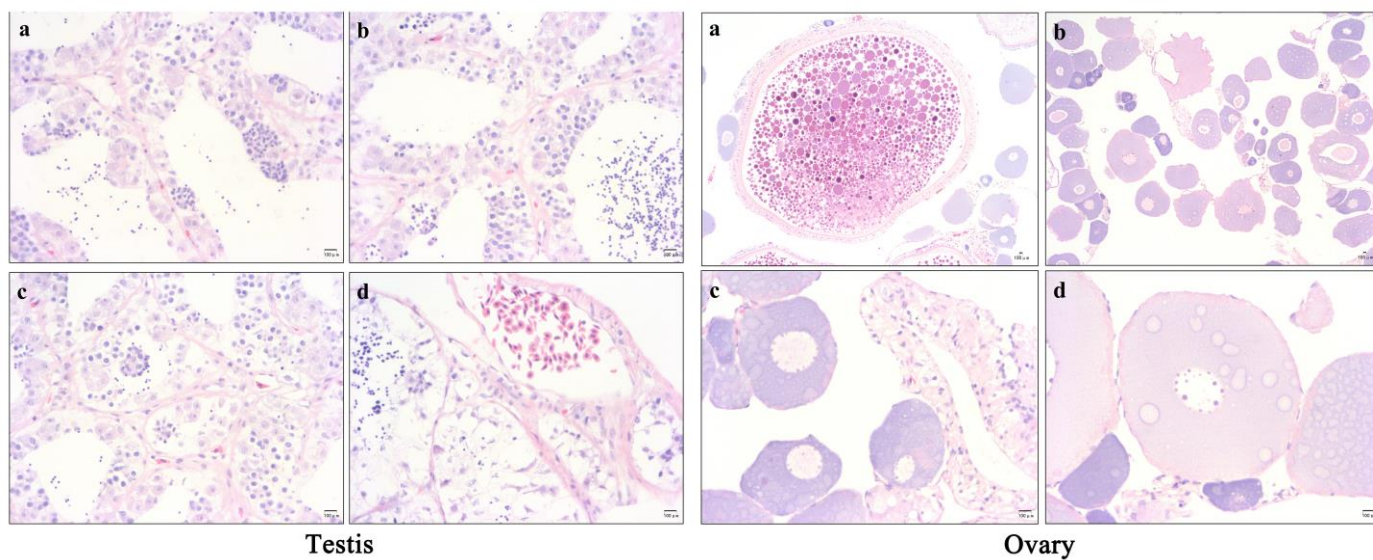

**Figure S1.** Histological structure of the testis and ovary of *Cranoglanis boudierius*

Supplement: s1 [file s1]
